# Supplementary material for: Low-power polarization transfer between deuterons and spin-1/2 nuclei using adiabatic RESPIRATIONCP in solid-state NMR
Source: Royal Society of Chemistry journal article supplement (doi:10.1039/c3cp54419b), 2014-01-01
Supplement: c3cp54419b.pdf [file c3cp54419b.pdf]

## Supplementary Material

### Sample preparation of the outer membrane protein G (OmpG)

The OmpG sample was prepared as described earlier<sup>1, 2</sup> with the following exceptions: after purification under denaturing conditions (8 M urea), the proton content of the backbone amide was set to 50 %. Similarly, the buffer for the subsequent refolding, reconstitution and 2D crystallization also contained 50 % H<sub>2</sub>O and 50 % D<sub>2</sub>O.

### Adiabatic <sup>RESPIRATION</sup>CP waveforms

The waveforms for the adiabatic <sup>RESPIRATION</sup>CP were generated using a SIMPSON script that converts a list of amplitudes and phases into a shape file for Topspin. The list of the amplitudes and phases can be generated using following analytic expression

$$v_{rf} = 2v_r \pm b \tan\left(\alpha\left(\frac{\tau}{2} - t\right)\right),$$

where  $\alpha = \frac{\Delta}{\tau} \tan^{-1}\left(\frac{\Delta}{b}\right)$ . In the present case, the parameters  $\Delta = 6000$  radian per sec and  $b = 6000/2\pi$  Hz were used. The adiabatic parameters  $b$  and  $\Delta$  are dependent on the dipole-dipole coupling strength and govern the shape of the wave.  $\tau$  is the total time for the pulse sequence and  $v_r$  is the sample spinning frequency.

The various waves used for demonstrating the efficiency versus rf amplitudes plots in the paper were generated using the above scripts and the plots for the amplitude profiles on the two channels are shown in Fig. S1.

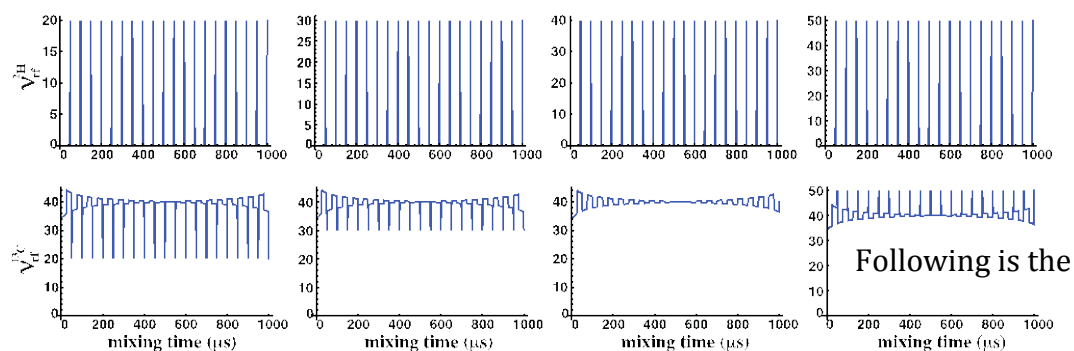

**Fig. S1.** Rf waves of lengths 1 ms (the short pulses are 4μs long) corresponding to different rf amplitudes for <sup>2</sup>H channel (top row) and <sup>13</sup>C channel (bottom row). Here the y-axis labels represent all the three kinds of power levels used as explained in figure-1c in the article.

SIMPSON script (.in file) that generates two lists (.store files) containing the rf amplitudes and phases for the two channels under consideration (<sup>2</sup>H and <sup>13</sup>C in this case) and also generates the build up curve showing the transfer efficiency of the generated lists.

```
spinsys {  
  channels 2H 13C  
  nuclei 2H 13C  
  shift 1 0 0 0 0 0  
  quadrupole 1 2 0.18e6 0.1 0 0 0  
  shift 1 0p 7.7p 0.65 -162.46 65.58 66.979
```

```
dipole 1 2 -3689 0 14.167 -94.159
jcoupling 1 2 21.5 0 0 0 0 0
}

par {
  method          direct
  proton_frequency 400e6
  start_operator   I1x
  detect_operator  I2x
  spin_rate        20000
  sw               spin_rate
  gamma_angles     5
  crystal_file     rep20

  #power level parameters
  variable qr      2*spin_rate
  #Short pulse on C channel
  variable vrfC    20000
  #Short pulse on D channel
  variable vrfD    20000

  #rotor period
  variable tr      1.0e6/spin_rate

  variable pi      3.14
  #adiabatic parameters:
  variable delta   6000
  #adiabatic parameter:
  variable b1      6000.0/(2.0*pi)
  #total length of pulse sequence:
  variable tau     1000
  #length of each pulse:
  variable dtau    2
  #total number of pulses:
  variable nstep   tau/dtau
  #number of short pulses per rotor period
  variable npul    1
  #adiabatic parameter - do not change!:
  variable alfa    2.0*atan(delta/b1)/tau

  #number of recoupling pulses per rotor period
  variable n        int(tr/dtau)-npul

  np              int(tau/tr)+1
}

proc block1 {} {
  global par ptype rf_N ph_N
  maxdt 1.0

  #phase calculation for the two Continuous pulses per period
  for {set i 1} {$i<=$par(n)} {incr i} {
    if {$i==1} {
      set b 0.0
    }
    if {$i==[expr $par(n)/2+1]} {
      set b 180.0
    }
    set ph_N_first($i) $b
  }

  #Amplitude calculation for the two Continuous pulses (adiabtic waves)
  for {set j 1} {$j<=$par(nstep)} {incr j} {

    set jj [expr int(fmod([expr $j-1], $par(n))+1)]

    set ph_N($j) $ph_N_first($jj)

  }

  #time increment in steps of dtau
  set tt [expr $j*$par(dtau)]

  #the adiabatic expression
  set wrf_dream [expr - $par(b1)*tan($par(alfa)*(0.5*$par(tau)-$tt))]

  if {$jj==1} {
    set b 1
  }
}
```

```
        if {$jj==[expr $par(n)/2+1]} {
            set b -1
        }

        set rf_N($j) [expr $par(qr)+$b*$wrf_dream]
    }
}

#To store the lists of Amplitudes and Phases for both the channels
proc rfstoreC {} {
    global par ptype rf_N ph_N
    set rfstoreC [open $par(name)_rfC.store w]

    for {set j 1} {$j<$par(np)} {incr j} {

        set k [expr ($j-1)*$par(n)]
        for {set i [expr $k+1]} {$i<=[expr $k+$par(n)]} {incr i} {
            puts $rfstoreC "$rf_N($i)"
        }
        for {set p 1} {$p <= $par(npul)} {incr p} {
            puts $rfstoreC "$par(vrfC) 0.0"
        }
    }

    close $rfstoreC
}

proc rfstoreD {} {
    global par ptype rf_N ph_N
    set rfstoreD [open $par(name)_rfD.store w]

    for {set j 1} {$j<$par(np)} {incr j} {

        set k [expr ($j-1)*$par(n)]
        for {set i [expr $k+1]} {$i<=[expr $k+$par(n)]} {incr i} {
            puts $rfstoreD "0.0"
        }
        for {set p 1} {$p <= $par(npul)} {incr p} {
            puts $rfstoreD "$par(vrfD) 0.0"
        }
    }

    close $rfstoreD
}

proc pulseq_excitation {} {
    global par t tcount rf_N ph_N

    block1
    store 1

    reset

    store 2
    acq

    reset

    prop 1

    for {set j 1} {$j<$par(np)} {incr j} {
        reset
        set k [expr ($j-1)*$par(n)]
        prop 2
        for {set i [expr $k+1]} {$i<=[expr $k+$par(n)]} {incr i} {
            pulse $par(dttau) 0.0 0.0 $rf_N($i) $ph_N($i)
        }
        for {set p 1} {$p <= $par(npul)} {incr p} {
            pulse $par(dttau) $par(vrfD) 0.0 $par(vrfC) 0.0
        }

        store 2
    }

    acq
}
```

```
    }  
  }  
  
proc main {} {  
  global par type scanpar  
  set par(verbose) 1  
  set par(pulse_sequence) pulseseq_excitation  
  set f [fsimpson]  
  fsave $f $par(name).fid  
  rfstoreC  
  rfstoreD  
  fsave $f $par(name).xy -xreim  
}
```

## The script for converting the list of amplitudes and phases into a bruker wave:

```
#!/usr/bin/tclsh  
global argv  
  
if {[llength $argv] != 3} {  
  puts stderr "error: specify basename of spin-file to open"  
  puts stderr "and the time stepsize in microsec"  
  puts stderr "and the nominal rf field strength on I"  
  exit  
}  
  
set name [lindex $argv 0]  
set deltat [lindex $argv 1]  
set nomrfI [lindex $argv 2]  
  
set file [open $name r]  
set indx 0  
  
set maxrfI -100000  
set minrfI 100000  
set maxfiI -7200  
set minfiI 7200  
set avrfI 0  
  
while {[gets $file s] != -1} {  
  incr indx  
  set lst {}  
  foreach i [split $s] {  
    if {$i != {}} {  
      lappend lst $i  
    }  
  }  
  set rfI($indx) [lindex $lst 0]  
  set fiI($indx) [lindex $lst 1]  
  
  set avrfI [expr $avrfI + $rfI($indx)]  
  
  if {$fiI($indx) < 0} {  
    set fiI($indx) [expr $fiI($indx)+360.0]  
  }  
  if {$rfI($indx) > $maxrfI} {  
    set maxrfI $rfI($indx)  
  }  
  if {$rfI($indx) < $minrfI} {  
    set minrfI $rfI($indx)  
  }  
  if {$fiI($indx) > $maxfiI} {  
    set maxfiI $fiI($indx)  
  }  
  if {$fiI($indx) < $minfiI} {  
    set minfiI $fiI($indx)  
  }  
}  
  
puts "number of steps in wave form      : $indx"  
puts "deltat in wave form                : $deltat"  
puts ""  
puts "maximum I-spin rf field strength: $maxrfI"  
puts "minimum I-spin rf field strength: $minrfI"
```

```
puts "average I-spin rf field strength: [expr $avrFI/$indx]"
puts "nom. max I-spin rf field strength: $nomrfI"
puts "maximum I-spin rf field phase : $maxfii"
puts "minimum I-spin rf field phase : $minfii"

set outfI [open $name\_I.waves w]

set minI [expr $minrfI*100.0/$nomrfI]
set maxI [expr $maxrfI*100.0/$nomrfI]

puts $outfI "##TITLE= /u/exp/stan/nmr/lists/wave/$name\_I.wave"
puts $outfI "##JCAMP-DX= 5.00 Bruker JCAMP library"
puts $outfI "##DATA TYPE= Shape Data"
puts $outfI "##ORIGIN= Bruker Analytik GmbH"
puts $outfI "##OWNER= <ab>"
puts $outfI "##DATE= 03/11/10"
puts $outfI "##TIME= 08:15:00"
puts $outfI "##MINX= $minI"
puts $outfI "##MAXX= $maxI"
puts $outfI "##MINY= $minfii"
puts $outfI "##MAXY= $maxfii"
puts $outfI "##\SSHAPE_EXMODE= Excitation"
puts $outfI "##\SSHAPE_TOTROT= 0.000000e+00"
puts $outfI "##\SSHAPE_BWFAC= 0.000000e+00"
puts $outfI "##\SSHAPE_INTEGFAC= 7.460936e-01"
puts $outfI "##\SSHAPE_MODE= 0"
puts $outfI "##NPOINTS= $indx"
puts $outfI "##XYPOINTS= (XY..XY)"
for {set i 1} {$i <= $indx} {incr i} {
  set ampl [expr $rfI($i)*100/$nomrfI]
  puts $outfI " [format "%8.6e" $ampl], [format "%8.6e" $fii($i)] "
}
puts $outfI "##END="
```

1. M. Hiller, L. Krabben, K. R. Vinothkumar, F. Castellani, B.-J. van Rossum, W. Kühlbrandt and H. Oschkinat, *ChemBioChem*, 2005, **6**, 1679-1684.
2. D. Lalli, P. Schanda, A. Chowdhury, J. Retel, M. Hiller, V. Higman, L. Handel, V. Agarwal, B. Reif, B. Rossum, Ü. Akbey and H. Oschkinat, *Journal of biomolecular NMR*, 2011, **51**, 477-485.
